# Supplementary material for: Cucurbit[7]uril encapsulation completely protects reactive imine in weak acid
Source: Royal Society of Chemistry journal article supplement (doi:10.1039/d4ob01879f), 2025-01-01
Supplement: d4ob01879f2.pdf [file d4ob01879f2.pdf]

*Electronic Supplementary Information for:*

**Cucurbit[7]uril encapsulation completely protects reactive imine in weak acid**

Kejia Shi, and Bradley D. Smith\*

Department of Chemistry and Biochemistry, 251 Nieuwland Science Hall, University of

Notre Dame, Notre Dame, Indiana 46556, USA. E-mail: [smith.115@nd.edu](mailto:smith.115@nd.edu)

## 1. Materials and general methods

All commercially available compounds were purchased from Sigma-Aldrich, Oakwood Chemicals, and AK Scientific unless noted otherwise. **CB7** was purchased from BOC Sciences. All the compounds have a purity of at least 97% and were used without any purification. All absorption spectra were collected using quartz cuvettes (1 mL, 1 cm path length). Flash column chromatography was performed using Biotage SNAP Ultra columns. <sup>1</sup>H NMR spectra were recorded on a Bruker 400 or Bruker 500 NMR spectrometer. The NMR spectra were processed using MestreNova software v9.0. Chemical shifts are presented in ppm and referenced by residual solvent peak.

## 2. Compound synthesis and characterization

### Synthesis of imine 1

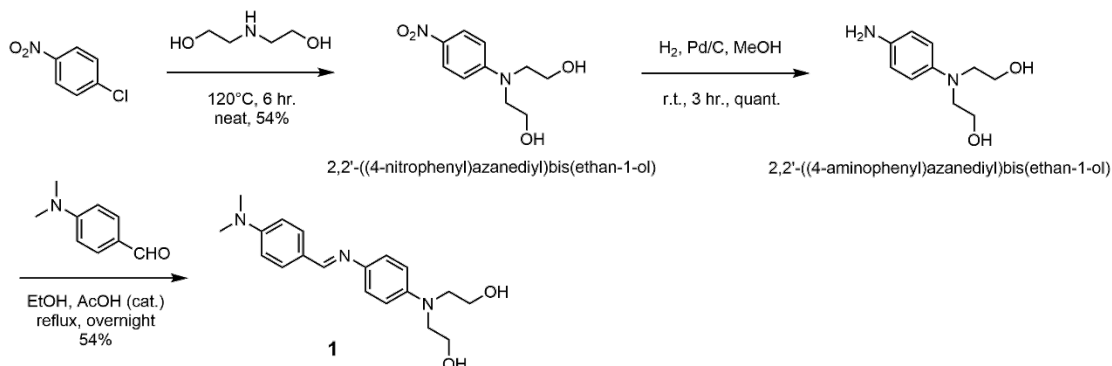

A mixture of 4-chloronitrobenzene 1.57 g (10 mmol) and diethanolamine (2.10 g, 20 mmol) was heated with stirring at 120 °C for 6 hours. The mixture was poured into water and extracted multiple times with EtOAc, and the combined organic layers were washed with brine, dried over anhydrous Na<sub>2</sub>SO<sub>4</sub>. The crude product was further purified with column chromatography on silica using EtOAc/Hexanes as eluent to give 2,2'-((4-nitrophenyl)azanediyl)bis(ethan-1-ol) as orange solid (1.22 g, 54%). <sup>1</sup>H NMR (400 MHz, Chloroform-*d*) δ 8.10 (d, *J* = 9.5 Hz, 2H), 6.66 (d, *J* = 9.4 Hz, 2H), 3.95 (t, *J* = 5.0 Hz, 4H), 3.73 (t, *J* = 4.9 Hz, 4H), 2.89 (s, 2H).

To a solution of 2,2'-((4-nitrophenyl)azanediyl)bis(ethan-1-ol) (226 mg, 1 mmol) in methanol (20 mL), 10% Pd/C (200 mg) was added. A balloon filled with H<sub>2</sub> gas was attached to the flask of reaction mixture. After stirring overnight, the reaction mixture was filtered over celite. The filtrate was then dried *in vacuo*, giving 2,2'-((4-aminophenyl)azanediyl)bis(ethan-1-ol) as product (196 mg, quant.). <sup>1</sup>H NMR (400 MHz, Chloroform-*d*) δ 6.71 (d, *J* = 8.9 Hz, 2H), 6.68 – 6.62 (m, 2H), 3.74 (t, *J* = 5.1 Hz, 4H), 3.45 – 3.34 (m, 6H), 2.80 (d, *J* = 4.5 Hz, 2H).

One drop of acetic acid was added as catalyst to a solution of 2,2'-((4-aminophenyl)azanediyl)bis(ethan-1-ol) (98 mg, 0.5 mmol) and *p*-dimethylamino-

benzaldehyde (75 mg, 0.5 mmol) in anhydrous ethanol (20 mL) and the resulting solution was refluxed overnight. After cooling to room temperature, the solvent was removed *in vacuo*. The crude product was further purified with column chromatography on silica using EtOAc/Hexanes as eluent to give imine **1** as orange solid (88 mg, 54%).  $^1\text{H}$  NMR (400 MHz, DMSO- $d_6$ )  $\delta$  8.41 (s, 1H), 7.69 (d,  $J$  = 8.9 Hz, 2H), 7.14 (d,  $J$  = 9.0 Hz, 2H), 6.76 (d,  $J$  = 9.0 Hz, 2H), 6.68 (d,  $J$  = 9.1 Hz, 2H), 4.77 (t,  $J$  = 5.4 Hz, 2H), 3.54 (t,  $J$  = 5.9 Hz, 4H), 3.42 (t,  $J$  = 6.2 Hz, 4H), 2.99 (s, 6H).  $^{13}\text{C}$  NMR (101 MHz, DMSO- $d_6$ )  $\delta$  154.89, 151.80, 146.21, 140.09, 129.53, 124.73, 122.08, 111.69, 111.59, 58.27, 53.50, 39.83. HRMS (ESI-TOF)  $m/z$ :  $[\text{M} + \text{H}]^+$  calculated for  $\text{C}_{19}\text{H}_{26}\text{N}_3\text{O}_2^+$  328.201954, found 328.2020.

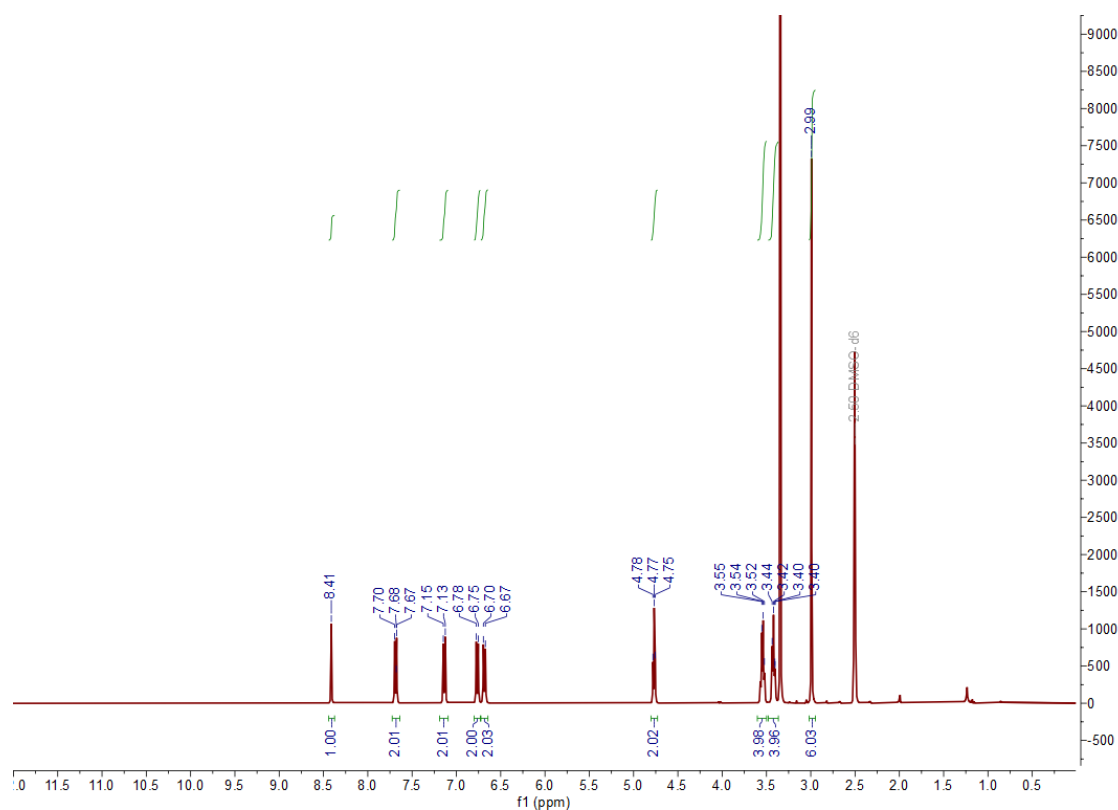

$^1\text{H}$  NMR spectrum of **1** in DMSO- $d_6$

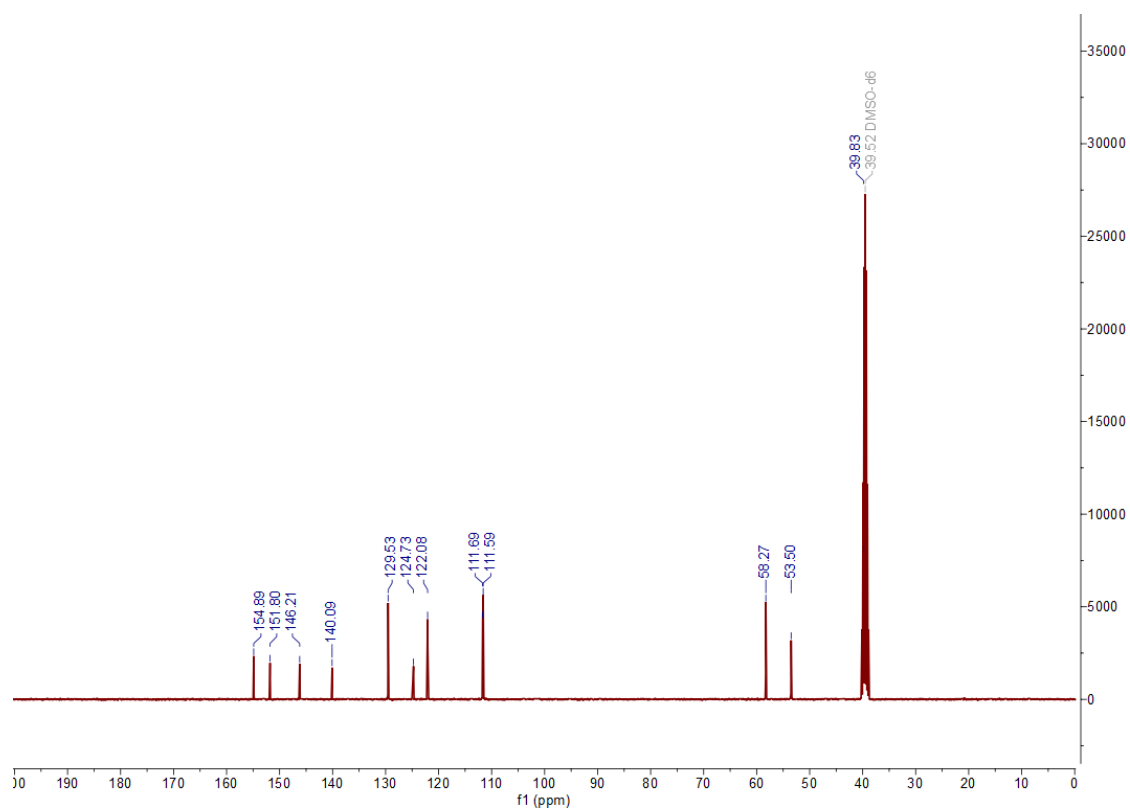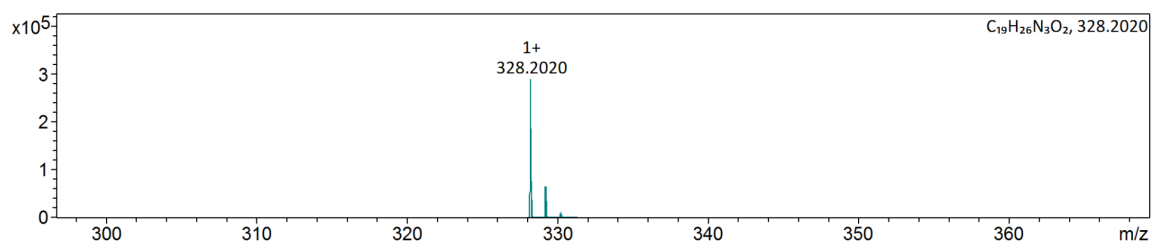

| Meas. m/z  | # | Ion Formula                                                   | m/z        | err [ppm] | Mean err [ppm] | rdB | N-Rule | e <sup>-</sup> Conf |
|------------|---|---------------------------------------------------------------|------------|-----------|----------------|-----|--------|---------------------|
| 328.202282 | 1 | C <sub>19</sub> H <sub>26</sub> N <sub>3</sub> O <sub>2</sub> | 328.201954 | -1.0      | -1.0           | 8.5 | ok     | even                |

Mass spectrum of **1**

## Synthesis of imine 2

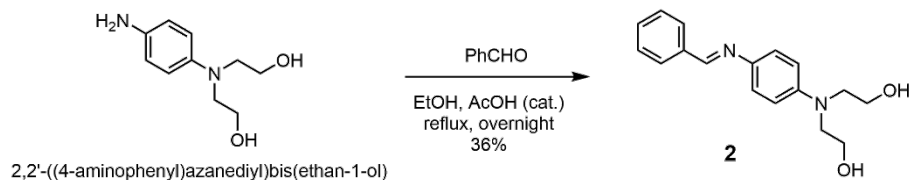

One drop of acetic acid was added as catalyst to a solution of 2,2'-((4-aminophenyl)azanediyl)bis(ethan-1-ol) (196 mg, 1 mmol) and benzaldehyde (212 mg, 2 mmol) in anhydrous ethanol (40 mL) and the resulting solution was refluxed overnight. After cooling to room temperature, the solvent was removed in vacuo. The crude product was further purified with column chromatography on silica using EtOAc/Hexanes as eluent to give **2** as yellow solid (103 mg, 36%).  $^1\text{H}$  NMR (400 MHz,  $\text{DMSO-}d_6$ )  $\delta$  8.63 (s, 1H), 7.87 (dd,  $J$  = 7.5, 2.2 Hz, 2H), 7.47 (dd,  $J$  = 6.0, 1.6 Hz, 3H), 7.25 (d,  $J$  = 9.0 Hz, 2H), 6.72 (d,  $J$  = 9.0 Hz, 2H), 4.79 (t,  $J$  = 5.4 Hz, 2H), 3.54 (t,  $J$  = 5.9 Hz, 4H), 3.44 (t,  $J$  = 6.3 Hz, 4H).  $^{13}\text{C}$  NMR (101 MHz,  $\text{DMSO-}d_6$ )  $\delta$  154.53, 147.11, 138.83, 136.86, 130.43, 128.75, 128.00, 122.66, 111.60, 58.21, 53.41. HRMS (ESI-TOF)  $m/z$ :  $[\text{M} + \text{H}]^+$  calculated for  $\text{C}_{17}\text{H}_{21}\text{N}_2\text{O}_2^+$  285.159754, found 285.1598.

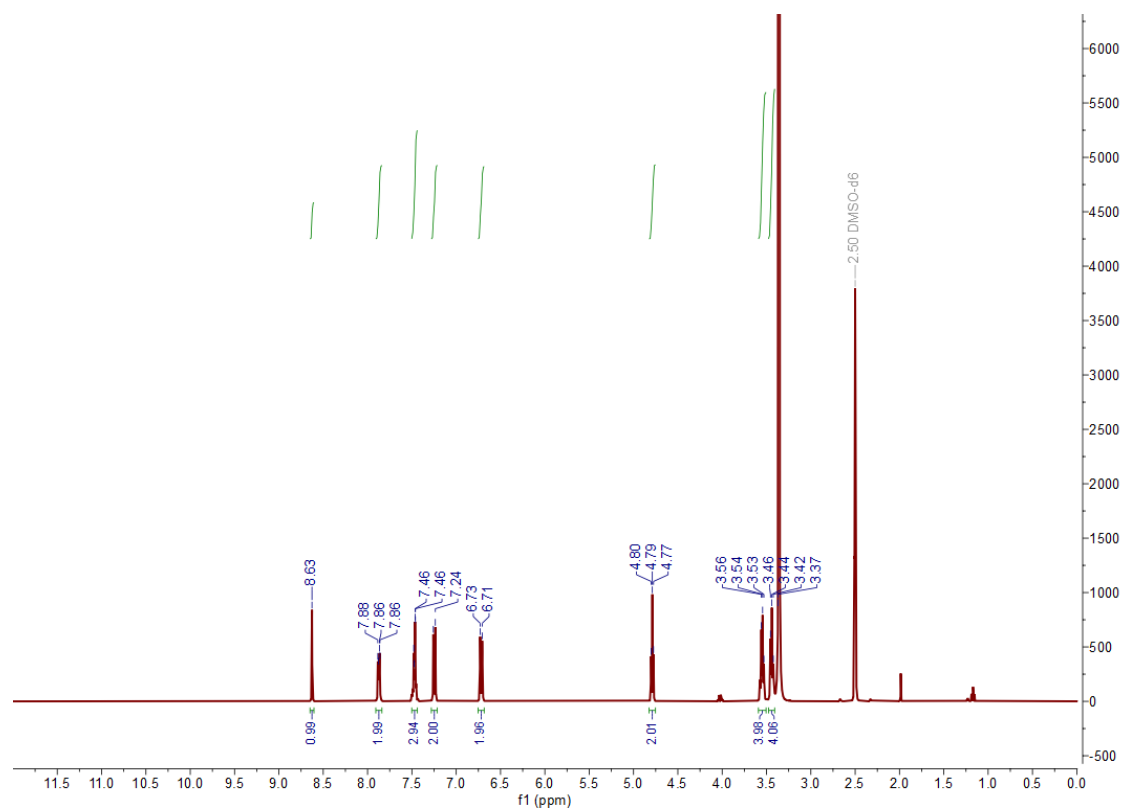

<sup>1</sup>H NMR spectrum of **2** in DMSO-*d*<sub>6</sub>

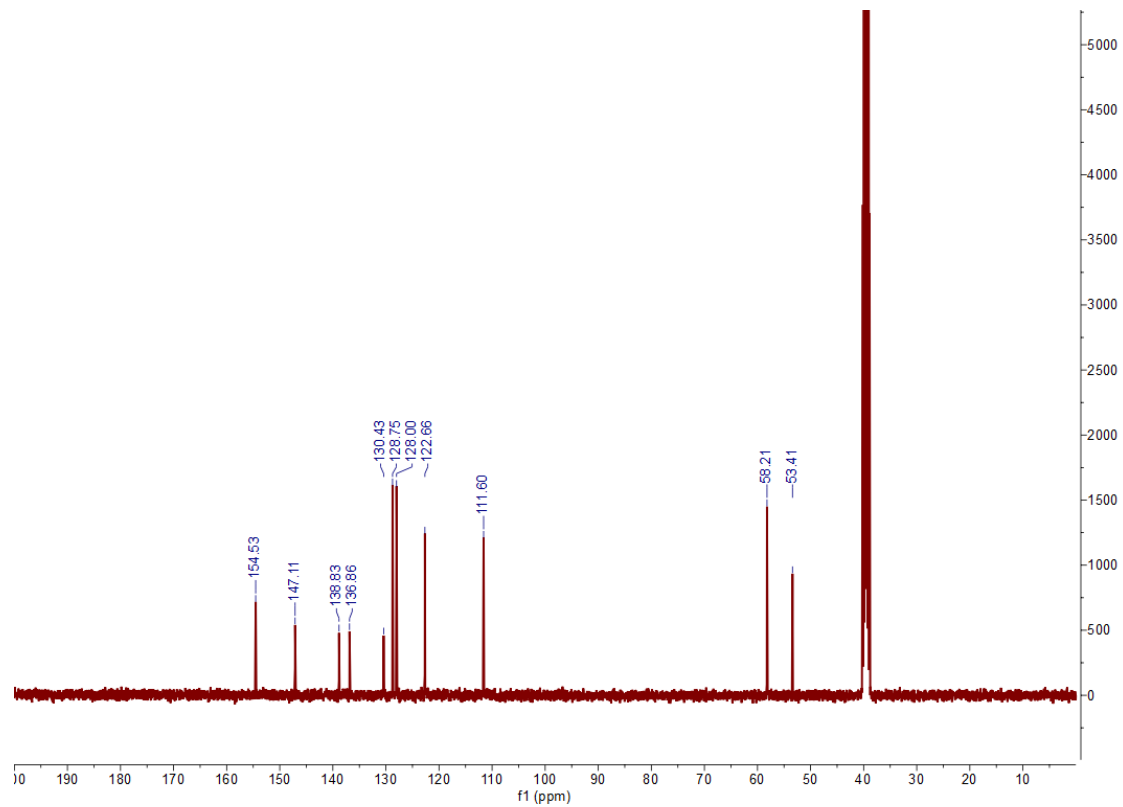

<sup>13</sup>C NMR spectrum of **2** in DMSO-*d*<sub>6</sub>

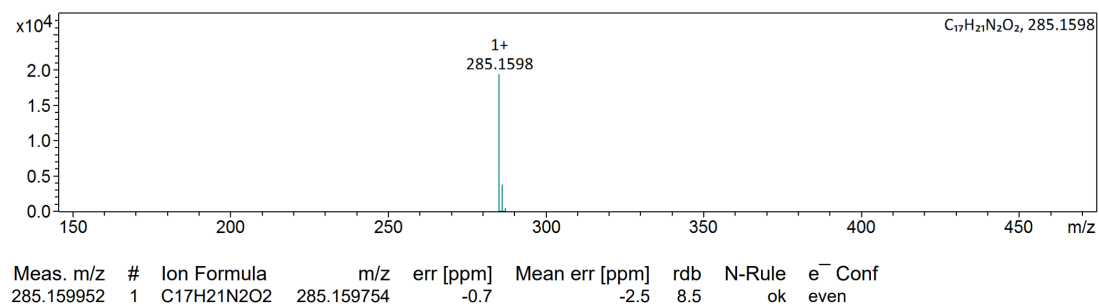

Mass spectrum of **2**

### 3. Characterization of 1·H<sup>+</sup>@CB7 complex

The spectra in **Fig. S1** and **S2** were obtained by preparing separate NMR samples. Each solution was generated by adding an aliquot of **1** in DMSO-*d*<sub>6</sub> to an appropriate solution of **CB7** in D<sub>2</sub>O containing acetic acid.

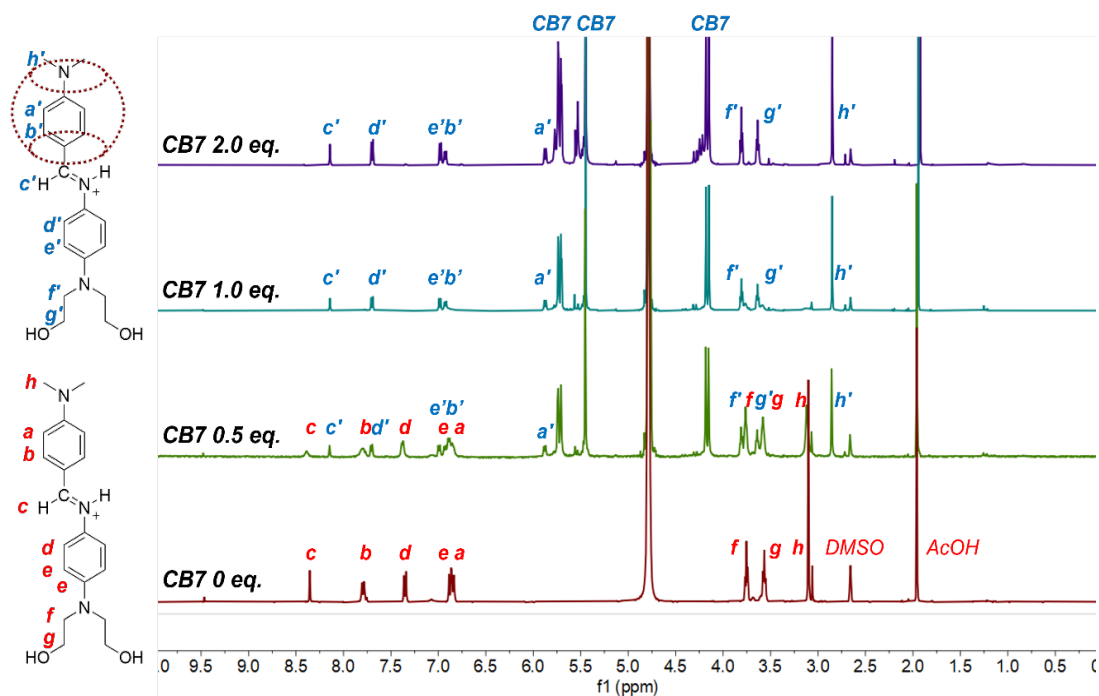

**Fig. S1** Full scale <sup>1</sup>H NMR spectra (400 MHz) and atom assignments for solutions of imine **1** (1.0 mM) mixed with 0 – 2.0 molar equivalents of **CB7** in D<sub>2</sub>O containing acetic acid and 2% DMSO-*d*<sub>6</sub> (pD = 4.70) at room temperature. Note, the very minor peaks at 9.5 ppm and the region 8.5 to 6.5 ppm reflects the minute amounts of imine hydrolysis that occurs in the short time between sample preparation and spectral acquisition.

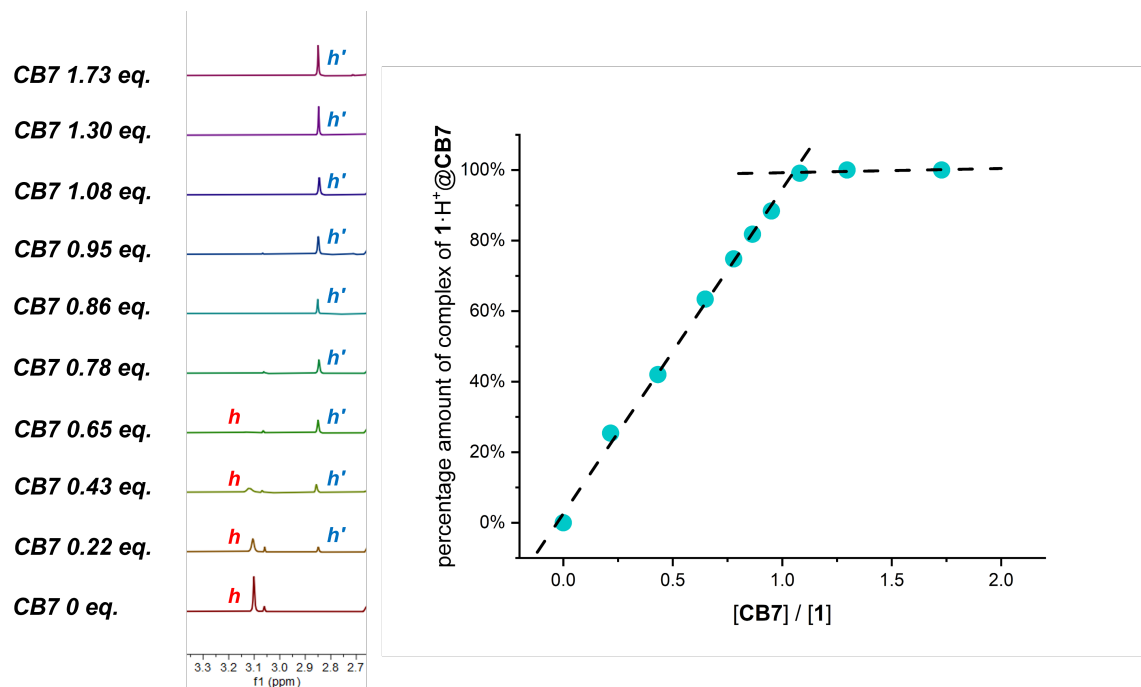

**Fig. S2** (*left*) Partial <sup>1</sup>H NMR spectra, for ten separate samples, showing dimethylamino peaks *h* and *h'* for **1** and 1·H<sup>+</sup>@CB7 complex, respectively. Peak integration gives the percentage amount of 1·H<sup>+</sup>@CB7 complex. (*right*) Plot identifies 1:1 stoichiometry for 1·H<sup>+</sup>@CB7 complex.

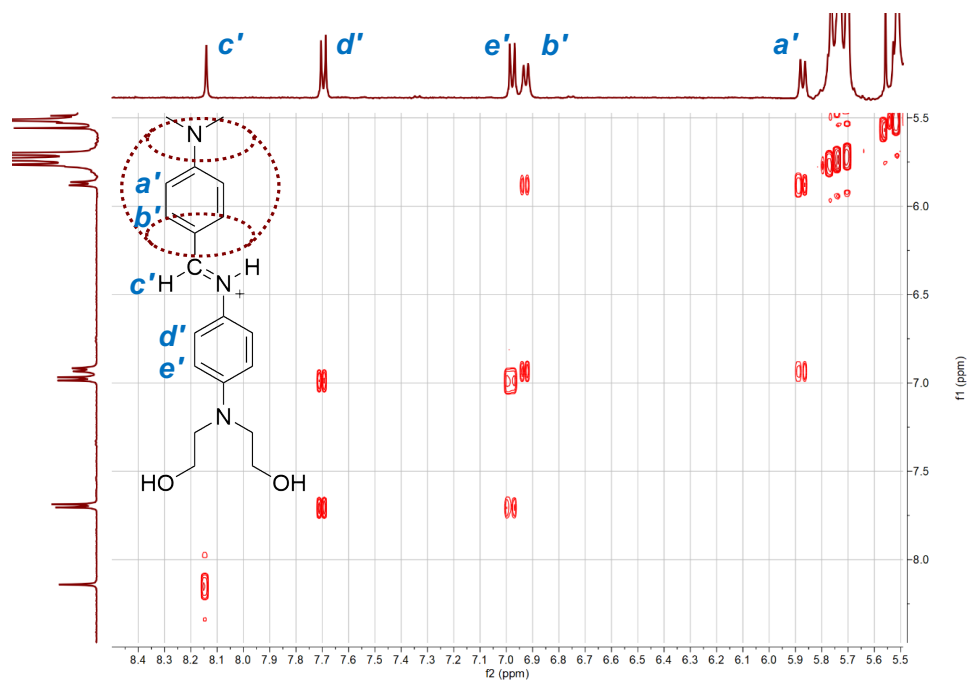

**Fig. S3** Partial COSY spectra of  $1 \cdot \text{H}^+ @ \text{CB7}$  complex in  $\text{D}_2\text{O}$  with acetic acid (2.0 mM) and 2%  $\text{DMSO-}d_6$  (pD = 4.70) at room temperature.

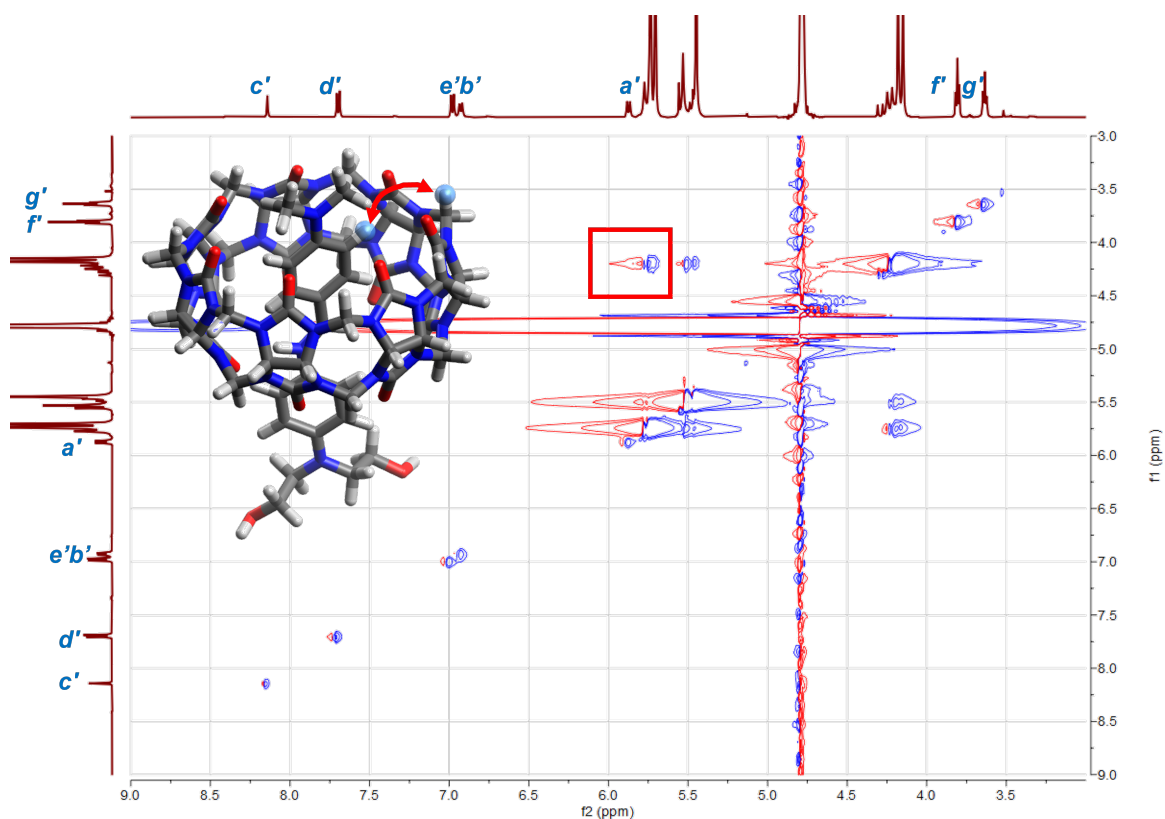

**Fig. S4** Partial NOESY spectrum of  $1 \cdot \text{H}^+ @ \text{CB7}$  complex in  $\text{D}_2\text{O}$  with acetic acid (2.0 mM) and 2%  $\text{DMSO-}d_6$  (pD = 4.70) at room temperature reveals a single intermolecular cross-peak (highlighted in the red box) reflecting cross-relaxation of imine proton  $\text{H}_{a'}$  and an inward-pointing hydrogen of the surrounding **CB7** (see double headed arrow drawn on the molecular model). The sparsity of intermolecular cross-peaks is a common feature of NOESY spectra of **CB7** complexes due in part to the outwardly directed **CB7** hydrogens.

#### 4. Determination of pKa and association constant for formation of $1\cdot\text{H}^+\text{@CB7}$ Complex

*Determination of pKa:* A series of phosphate buffer solutions was made with a pH range of 5.0 to 12.0. Aliquots of **1** in DMSO were added to each solution and a spectrum quickly acquired. An analogous set of absorption experiments were conducted in phosphate buffer solutions containing **CB7** (500  $\mu\text{M}$ ). The pKa of  $1\cdot\text{H}^+$  and  $1\cdot\text{H}^+\text{@CB7}$  were obtained by plotting the absorbance at 468 nm (**Fig. S5**).

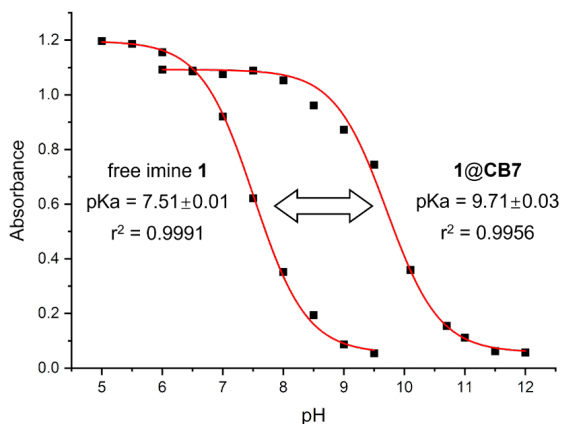

**Fig. S5** Titration experiment measured absorbance at 468 nm for  $1\cdot\text{H}^+$  (25  $\mu\text{M}$ ) or absorption at 465 nm for  $1\cdot\text{H}^+$  (25  $\mu\text{M}$ ) and **CB7** (500  $\mu\text{M}$ ), in phosphate buffer with 0.5% DMSO.

*Determination of Association Constant:* A series of solutions composed of 10 mM  $\text{NaHCO}_3$  –  $\text{Na}_2\text{CO}_3$  buffer (pH 8.80) containing 0 – 250  $\mu\text{M}$  **CB7** were made. Aliquots of **1** in DMSO were added to each solution and a spectrum quickly acquired. The absorbance values at 383 nm and 468 nm were plotted and the following logic was used to calculate the association constant for formation of  $1\cdot\text{H}^+\text{@CB7}$  complex.

Two major chemical processes exist in the solution:

$$[\text{G}]_0 = [\text{G}_{\text{np}}] + [\text{G}_{\text{p}}] + [\text{HG}_{\text{p}}]$$

$$[\text{H}]_0 = [\text{H}] + [\text{HG}_{\text{p}}]$$

where the total concentration of guest molecules  $[G]_0$  equals the sum of free non-protonated guest  $[G_{np}]$ , free protonated guest  $[G_p]$ , and encapsulated protonated guest  $[HG_p]$ . The total concentration of host molecules  $[H]_0$  equals the sum of free host  $[H]$  and complex  $[HG_p]$ . Whereas two sets of equilibria exist in the system:

$$K_a = \frac{[HG_p]}{[H][G_p]}$$

$$K_{iminium} = \frac{[G_{np}]}{[G_p][H^+]}$$

$K_a$ , the binding constant of  $G_p$  and host.  $K_{iminium}$ , acid dissociation constant of the iminium. Therefore, when measure in buffer where pH = 8.8, then  $K_{iminium} = 10^{-7.5}$ , and  $[G_{np}]/[G_p] = 20$ . The following equations can be obtained:

$$[HG_p]^2 - \left([H]_0 + [G]_0 + \frac{21}{K_a}\right)[HG_p] + [H]_0[G]_0 = 0$$

$$[HG_p] = \frac{1}{2} \left([H]_0 + [G]_0 + \frac{21}{K_a}\right) - \sqrt{\left([H]_0 + [G]_0 + \frac{21}{K_a}\right)^2 - 4[H]_0[G]_0}$$

The absorbance data then can be fitted with the following equation:

$$\Delta A_{obs} = \varepsilon [HG_p]$$

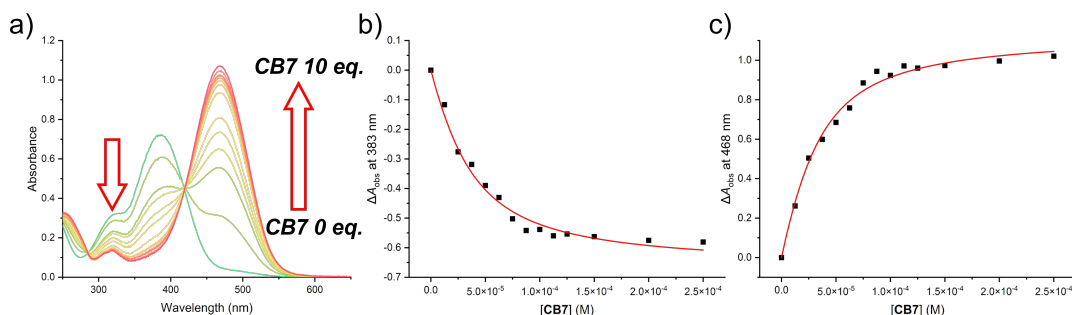

**Fig. S6** a) UV-Vis spectra of imine **1** (25 μM) upon **CB7** addition (0 – 10 eq.) in a 10 mM NaHCO<sub>3</sub> – Na<sub>2</sub>CO<sub>3</sub> buffer (pH 8.80). b) Association constant fitted with  $\Delta A_{obs}$  at 383 nm vs.  $[CB7]$ , obtained  $K_a = (0.92 \pm 0.14) \times 10^6 M^{-1}$ ,  $r^2 = 0.983$ . b) Association constant fitted with  $\Delta A_{obs}$  at 468 nm vs.  $[CB7]$ , obtained  $K_a = (1.09 \pm 0.14) \times 10^6 M^{-1}$ ,  $r^2 = 0.989$ . The average of the two association constants is  $1.0 \times 10^6 M^{-1}$ .

## 5. Hydrolysis of imines monitored using NMR spectroscopy

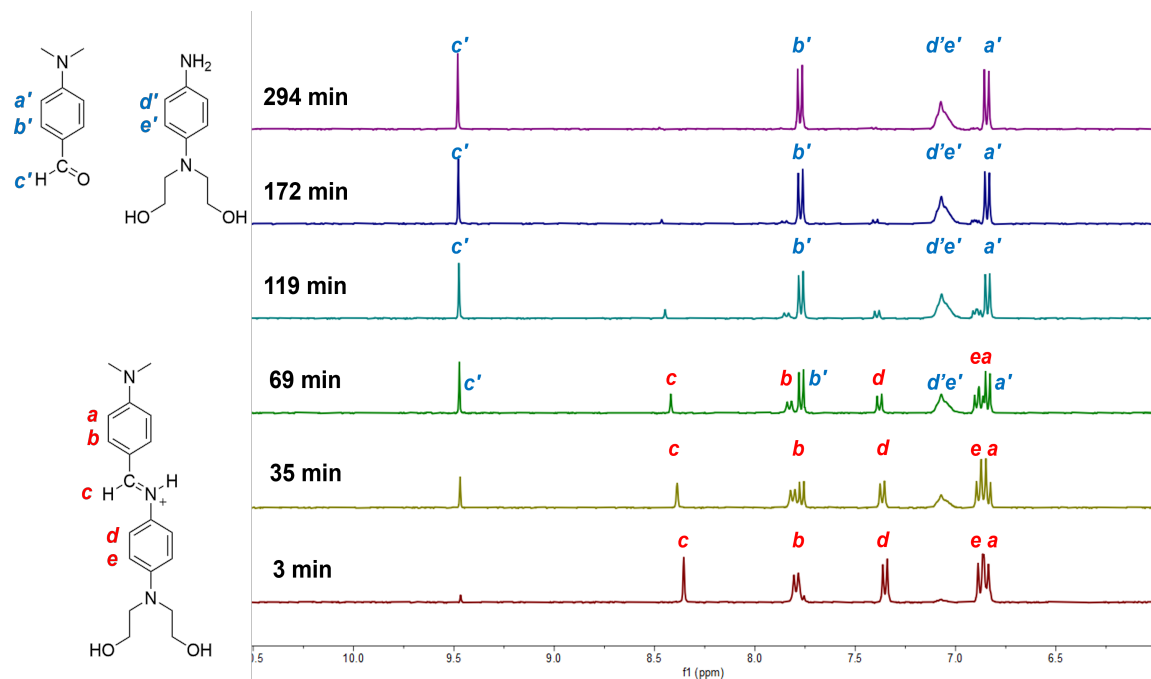

**Fig. S7**  $^1\text{H}$  NMR spectra of  $1\cdot\text{H}^+$  (1.0 mM) in  $\text{D}_2\text{O}$  with acetic acid (2.0 mM) and 2%  $\text{DMSO-}d_6$  (pD = 4.70) over time at room temperature.

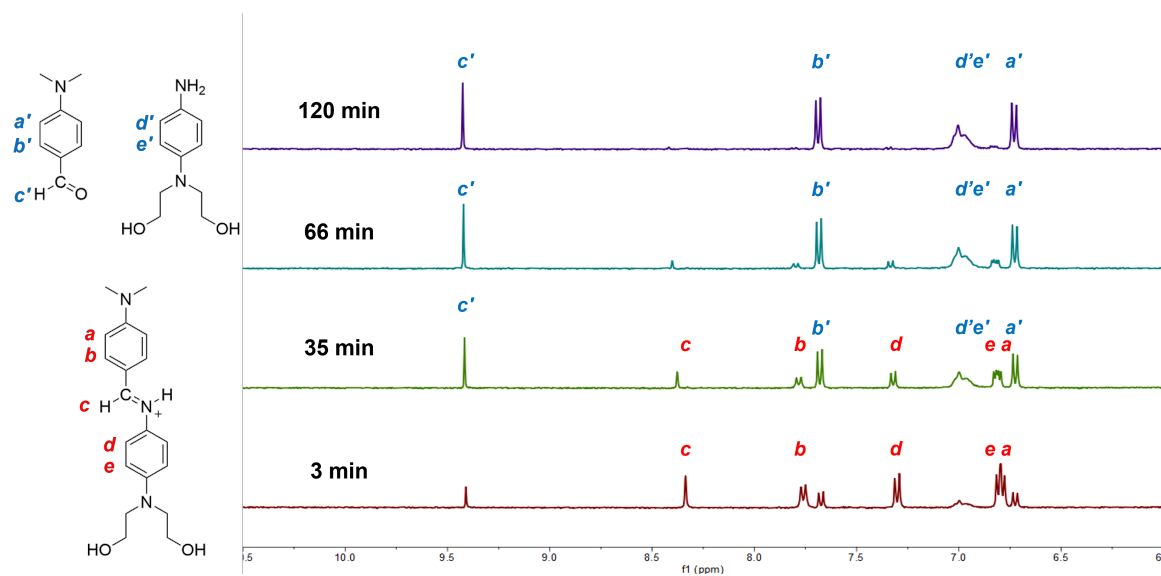

**Fig. S8**  $^1\text{H}$  NMR spectra of  $1\cdot\text{H}^+$  (1.0 mM) and  $\beta\text{-CD}$  (2.0 mM) in  $\text{D}_2\text{O}$  with acetic acid (2.0 mM) and 2%  $\text{DMSO-}d_6$  (pD = 4.70) over time at room temperature.

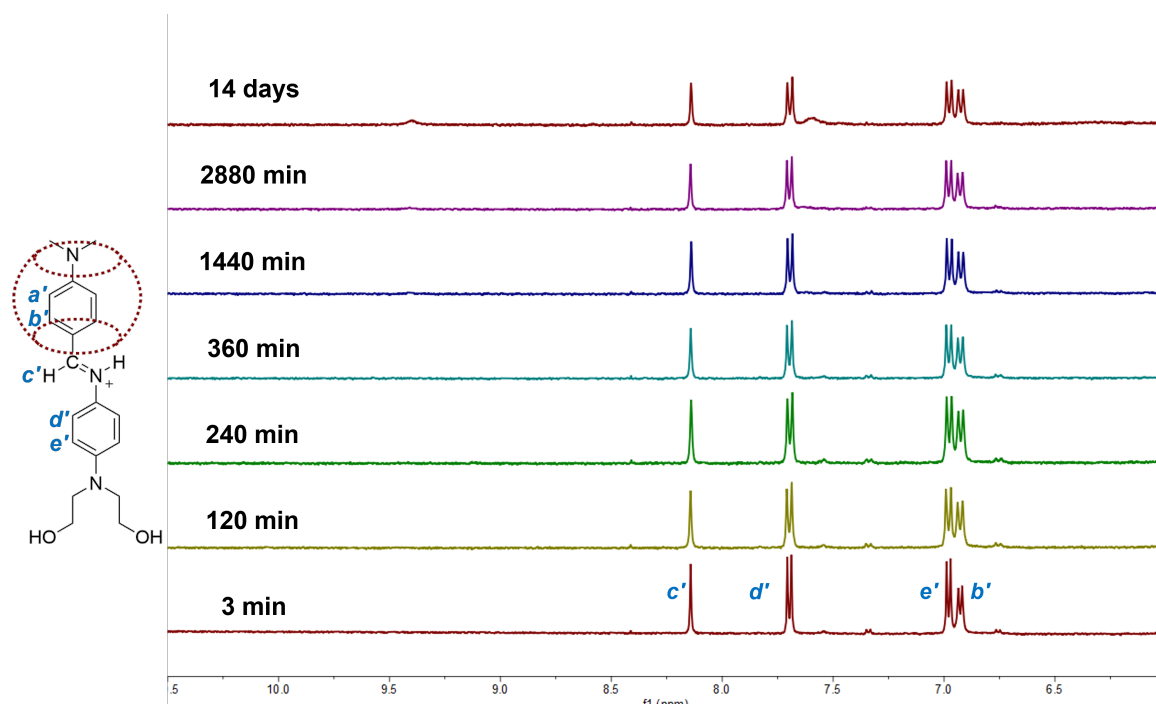

**Fig. S9**  $^1\text{H}$  NMR spectra of **1**· $\text{H}^+$  (1.0 mM) and **CB7** (2.0 mM) in  $\text{D}_2\text{O}$  with acetic acid (2.0 mM) and 2%  $\text{DMSO}-d_6$  (pD = 4.70) over time at room temperature.

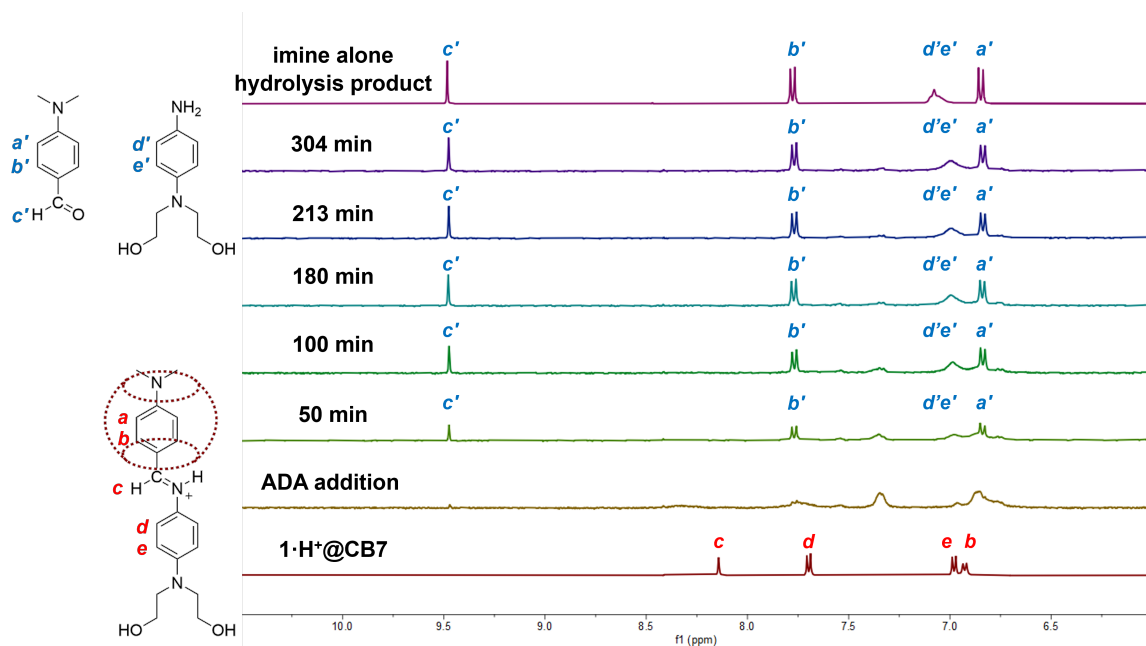

**Fig. S10**  $^1\text{H}$  NMR spectra for **ADA** displacement experiment over time. An aliquot of **ADA** acetate (2.0 mM) in  $\text{D}_2\text{O}$  with acetic acid (2.0 mM) was added to a solution of **1** (1.0 mM) and **CB7** (2.0 mM) in  $\text{D}_2\text{O}$  with acetic acid (2.0 mM) and 2%  $\text{DMSO}-d_6$  (pD = 4.70). The time points listed denote time after addition of the **ADA**.  $^1\text{H}$  NMR spectra acquired at room temperature.

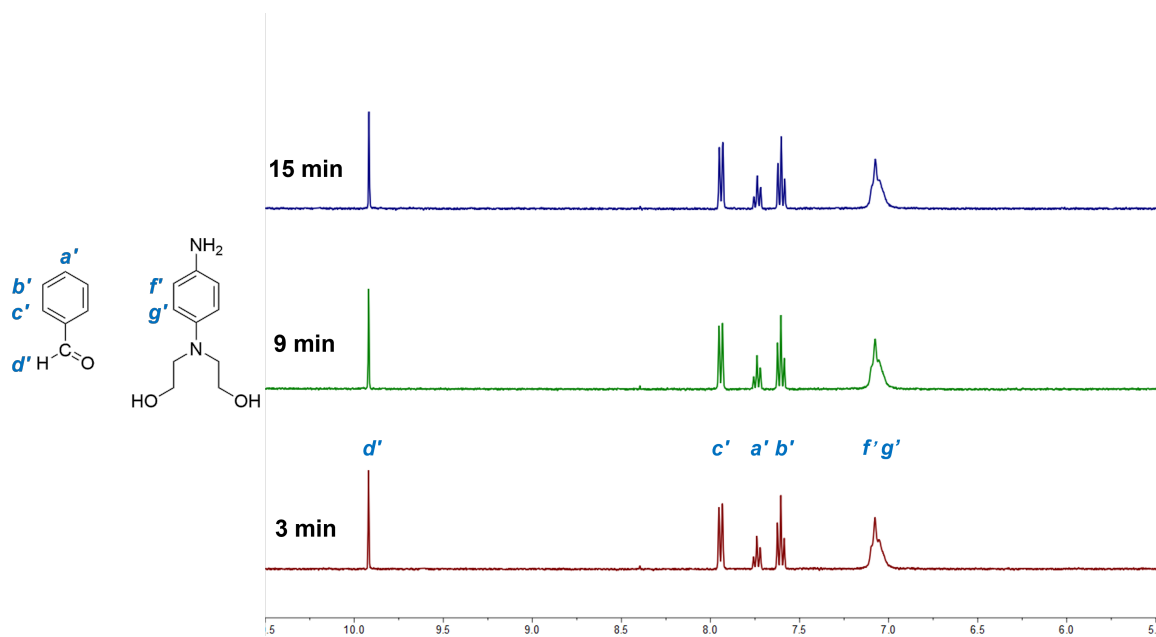

**Fig. S11**  $^1\text{H}$  NMR spectra showing that imine **2**· $\text{H}^+$  (1.0 mM) is instantly hydrolyzed in  $\text{D}_2\text{O}$  with acetic acid (2.0 mM) and 2%  $\text{DMSO}-d_6$  (pD = 4.70) at room temperature.

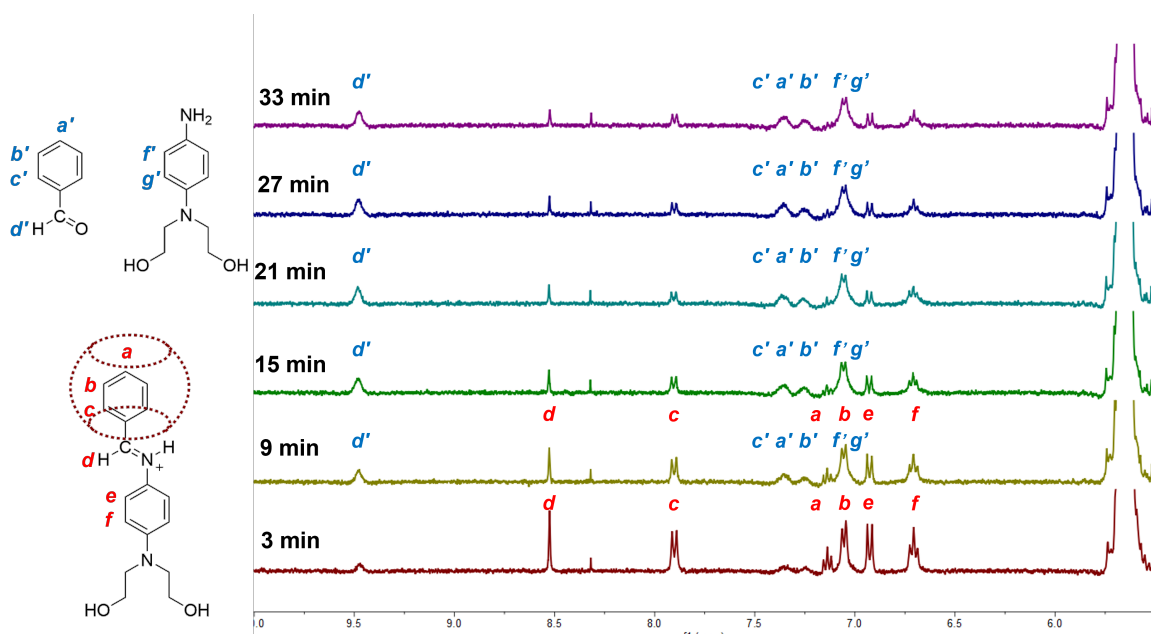

**Fig. S12**  $^1\text{H}$  NMR spectra of **2**· $\text{H}^+$  (1.0 mM) and **CB7** (2.0 mM) in  $\text{D}_2\text{O}$  with acetic acid (2.0 mM) and 2%  $\text{DMSO}-d_6$  (pD = 4.70) at room temperature shows hydrolysis of imine **2** with half-life of  $\sim 3$  mins.

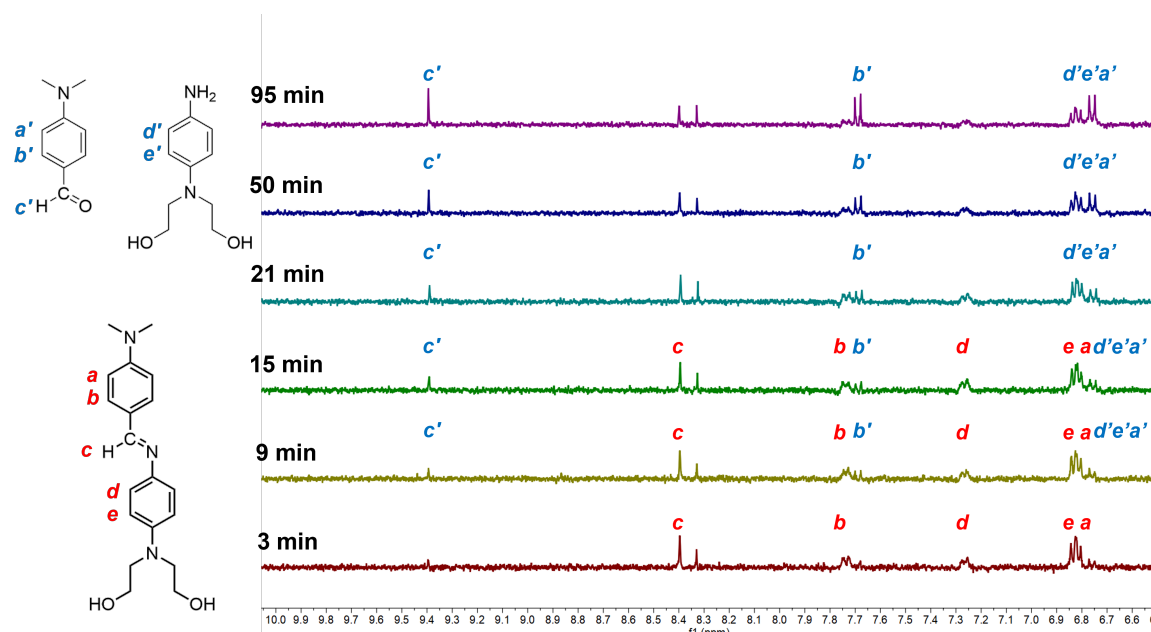

**Fig. S13**  $^1\text{H}$  NMR spectra of **1** (1.0 mM) in neutral  $\text{D}_2\text{O}$  with 2%  $\text{DMSO}-d_6$  at room temperature shows hydrolysis of imine **1** with half-life of  $\sim 50$  mins.

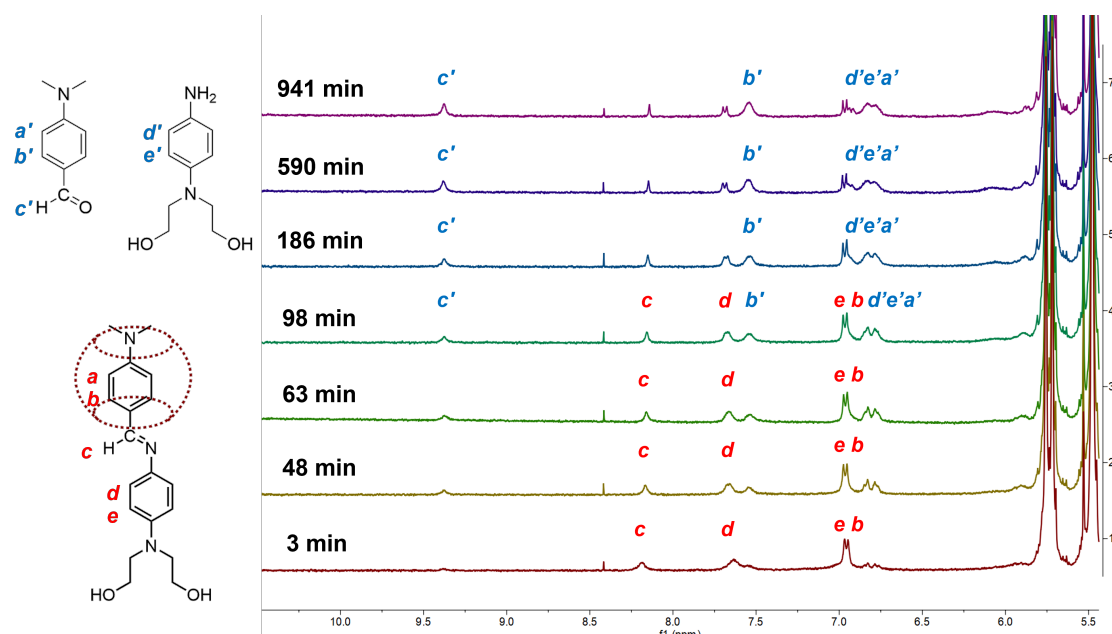

**Fig. S14**  $^1\text{H}$  NMR spectra of **1** (1.0 mM) and **CB7** (2.0 mM) in neutral  $\text{D}_2\text{O}$  with 2%  $\text{DMSO}-d_6$  at room temperature shows hydrolysis of imine **1** with half-life of  $\sim 120$  mins.

## 6. DFT calculated molecular models of $1\cdot\text{H}^+\text{@CB7}$

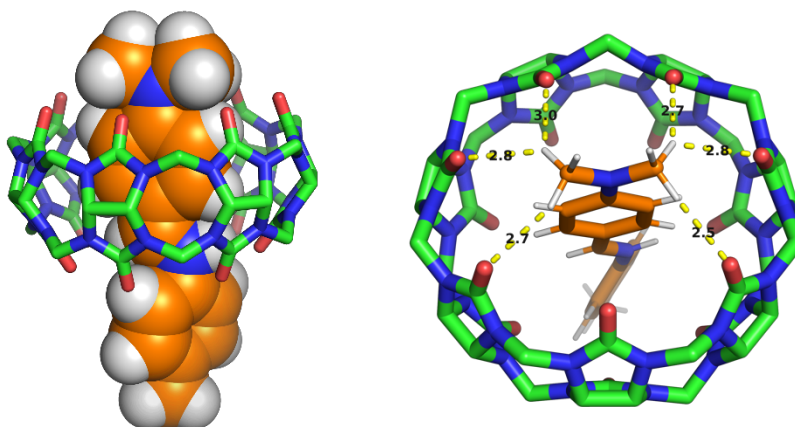

**Figure S15.** Models of the DFT-calculated, energy-minimized  $1\cdot\text{H}^+\text{@CB7}$  complex in water at room temperature (B3LYP/6-31G\*\*). Stabilizing CH $\cdots$ O interactions between the six *N,N*-dimethylamino hydrogens of  $1\cdot\text{H}^+$  and the oxygens within the top portal of **CB7** are highlighted. **CB7** hydrogens have been omitted for clarity.

Calculation Method = B3LYP, Basis Set = 6-31G(d, p), Charge = 1

Solvation = scrf = (cpcm, solvent = water), Electronic Energy (Hartree) = - 4914.03

Dipole Moment (Debye) = 3.014 (No imaginary frequency)

| No. | Atom | X      | Y      | Z      |
|-----|------|--------|--------|--------|
| 1   | C    | -0.901 | -5.699 | -0.502 |
| 2   | C    | 0.644  | -5.732 | -0.453 |
| 3   | N    | 0.946  | -5.166 | 0.837  |
| 4   | C    | -0.176 | -4.908 | 1.568  |
| 5   | O    | -0.204 | -4.539 | 2.713  |
| 6   | N    | -1.262 | -5.179 | 0.789  |
| 7   | N    | 1.032  | -4.932 | -1.585 |
| 8   | C    | -0.044 | -4.447 | -2.272 |
| 9   | O    | 0      | -3.816 | -3.295 |
| 10  | N    | -1.181 | -4.835 | -1.621 |
| 11  | H    | -1.349 | -6.673 | -0.656 |
| 12  | H    | 1.059  | -6.728 | -0.536 |
| 13  | C    | 3.948  | -4.276 | -0.244 |
| 14  | C    | 4.948  | -3.104 | -0.12  |

|    |   |        |        |        |
|----|---|--------|--------|--------|
| 15 | N | 4.459  | -2.38  | 1.028  |
| 16 | C | 3.455  | -3.047 | 1.669  |
| 17 | O | 2.95   | -2.722 | 2.712  |
| 18 | N | 3.148  | -4.158 | 0.943  |
| 19 | N | 4.825  | -2.424 | -1.38  |
| 20 | C | 3.862  | -2.973 | -2.174 |
| 21 | O | 3.602  | -2.638 | -3.301 |
| 22 | N | 3.266  | -3.991 | -1.486 |
| 23 | H | 4.422  | -5.249 | -0.286 |
| 24 | H | 5.971  | -3.423 | 0.039  |
| 25 | C | -5.079 | -2.861 | -0.3   |
| 26 | C | -4.142 | -4.083 | -0.42  |
| 27 | N | -3.42  | -4.072 | 0.821  |
| 28 | C | -3.698 | -2.973 | 1.576  |
| 29 | O | -3.249 | -2.73  | 2.666  |
| 30 | N | -4.607 | -2.211 | 0.898  |
| 31 | N | -3.364 | -3.778 | -1.598 |
| 32 | C | -3.868 | -2.707 | -2.279 |
| 33 | O | -3.525 | -2.344 | -3.374 |
| 34 | N | -4.853 | -2.141 | -1.523 |
| 35 | H | -6.125 | -3.123 | -0.203 |
| 36 | H | -4.667 | -5.022 | -0.545 |
| 37 | C | -5.419 | 2.193  | -0.18  |
| 38 | C | -5.812 | 0.695  | -0.171 |
| 39 | N | -5.062 | 0.165  | 0.94   |
| 40 | C | -4.328 | 1.12   | 1.569  |
| 41 | O | -3.616 | 0.936  | 2.531  |
| 42 | N | -4.538 | 2.311  | 0.954  |
| 43 | N | -5.391 | 0.232  | -1.467 |
| 44 | C | -4.838 | 1.226  | -2.22  |
| 45 | O | -4.48  | 1.125  | -3.365 |
| 46 | N | -4.789 | 2.361  | -1.465 |
| 47 | H | -6.261 | 2.865  | -0.075 |
| 48 | H | -6.871 | 0.524  | -0.029 |
| 49 | C | -1.639 | 5.56   | -0.386 |
| 50 | C | -3.047 | 4.933  | -0.293 |
| 51 | N | -3.154 | 4.161  | -1.499 |
| 52 | C | -1.994 | 4.165  | -2.219 |
| 53 | O | -1.825 | 3.642  | -3.289 |
| 54 | N | -1.065 | 4.898  | -1.533 |
| 55 | N | -2.98  | 4.167  | 0.928  |

|    |   |        |        |        |
|----|---|--------|--------|--------|
| 56 | C | -1.841 | 4.425  | 1.636  |
| 57 | O | -1.597 | 4.035  | 2.748  |
| 58 | N | -1.046 | 5.232  | 0.881  |
| 59 | H | -1.65  | 6.633  | -0.532 |
| 60 | H | -3.844 | 5.665  | -0.239 |
| 61 | C | 5.868  | 0.405  | -0.048 |
| 62 | C | 5.571  | 1.921  | -0.116 |
| 63 | N | 4.754  | 2.153  | 1.044  |
| 64 | C | 4.468  | 1.005  | 1.718  |
| 65 | O | 3.821  | 0.923  | 2.731  |
| 66 | N | 5.062  | -0.036 | 1.065  |
| 67 | N | 4.902  | 2.066  | -1.387 |
| 68 | C | 4.925  | 0.913  | -2.116 |
| 69 | O | 4.565  | 0.793  | -3.258 |
| 70 | N | 5.454  | -0.075 | -1.339 |
| 71 | H | 6.911  | 0.174  | 0.125  |
| 72 | H | 6.46   | 2.539  | -0.083 |
| 73 | C | 3.357  | 4.794  | -0.303 |
| 74 | C | 1.975  | 5.478  | -0.389 |
| 75 | N | 1.38   | 5.187  | 0.886  |
| 76 | C | 2.169  | 4.391  | 1.662  |
| 77 | O | 1.93   | 4.044  | 2.789  |
| 78 | N | 3.295  | 4.087  | 0.952  |
| 79 | N | 1.359  | 4.835  | -1.525 |
| 80 | C | 2.23   | 4.017  | -2.187 |
| 81 | O | 2.018  | 3.463  | -3.234 |
| 82 | N | 3.395  | 3.966  | -1.478 |
| 83 | H | 4.186  | 5.491  | -0.305 |
| 84 | H | 2.03   | 6.548  | -0.545 |
| 85 | C | -5.697 | -1.073 | -2.001 |
| 86 | H | -6.723 | -1.316 | -1.755 |
| 87 | H | -5.591 | -1.019 | -3.07  |
| 88 | C | -5.308 | -1.127 | 1.531  |
| 89 | H | -6.374 | -1.319 | 1.49   |
| 90 | H | -4.994 | -1.09  | 2.559  |
| 91 | C | -2.485 | -4.731 | -2.229 |
| 92 | H | -2.351 | -4.426 | -3.252 |
| 93 | H | -2.953 | -5.71  | -2.208 |
| 94 | C | -2.608 | -5.162 | 1.299  |
| 95 | H | -3.094 | -6.091 | 1.027  |
| 96 | H | -2.552 | -5.09  | 2.37   |

|     |   |        |        |        |
|-----|---|--------|--------|--------|
| 97  | C | 2.367  | -4.919 | -2.128 |
| 98  | H | 2.303  | -4.643 | -3.165 |
| 99  | H | 2.777  | -5.919 | -2.051 |
| 100 | C | 2.26   | -5.185 | 1.424  |
| 101 | H | 2.72   | -6.147 | 1.229  |
| 102 | H | 2.145  | -5.056 | 2.486  |
| 103 | C | -4.397 | 3.637  | -2.012 |
| 104 | H | -4.293 | 3.515  | -3.075 |
| 105 | H | -5.178 | 4.36   | -1.809 |
| 106 | C | -4.135 | 3.566  | 1.54   |
| 107 | H | -4.973 | 4.251  | 1.472  |
| 108 | H | -3.904 | 3.394  | 2.576  |
| 109 | C | 0.161  | 5.335  | -2.154 |
| 110 | H | 0.191  | 6.419  | -2.143 |
| 111 | H | 0.155  | 4.992  | -3.173 |
| 112 | C | 0.178  | 5.808  | 1.376  |
| 113 | H | 0.196  | 6.857  | 1.104  |
| 114 | H | 0.174  | 5.718  | 2.448  |
| 115 | C | 4.592  | 3.342  | -1.983 |
| 116 | H | 4.467  | 3.186  | -3.039 |
| 117 | H | 5.422  | 4.019  | -1.817 |
| 118 | C | 4.438  | 3.459  | 1.563  |
| 119 | H | 4.233  | 3.36   | 2.614  |
| 120 | H | 5.305  | 4.096  | 1.428  |
| 121 | C | 5.731  | -1.4   | -1.839 |
| 122 | H | 6.736  | -1.675 | -1.544 |
| 123 | H | 5.671  | -1.364 | -2.912 |
| 124 | C | 5.206  | -1.333 | 1.677  |
| 125 | H | 4.857  | -1.26  | 2.692  |
| 126 | H | 6.257  | -1.602 | 1.68   |
| 127 | C | -1.246 | 0.175  | -4.545 |
| 128 | N | 0.018  | 0.037  | -3.828 |
| 129 | C | 1.247  | -0.101 | -4.6   |
| 130 | C | 0.046  | -0.024 | -2.492 |
| 131 | C | 1.267  | -0.186 | -1.786 |
| 132 | C | 1.279  | -0.234 | -0.423 |
| 133 | C | -1.153 | 0.062  | -1.72  |
| 134 | C | -1.115 | 0.02   | -0.361 |
| 135 | C | 0.102  | -0.119 | 0.344  |
| 136 | C | 0.225  | -0.144 | 1.751  |
| 137 | N | -0.709 | 0.048  | 2.632  |

|     |   |        |        |        |
|-----|---|--------|--------|--------|
| 138 | C | -0.504 | -0.04  | 4.043  |
| 139 | C | 0.188  | -1.102 | 4.593  |
| 140 | C | 0.377  | -1.15  | 5.968  |
| 141 | C | -0.133 | -0.165 | 6.801  |
| 142 | C | -0.842 | 0.886  | 6.22   |
| 143 | C | -1.028 | 0.958  | 4.854  |
| 144 | H | -1.036 | 0.256  | -5.599 |
| 145 | H | -1.773 | 1.067  | -4.235 |
| 146 | H | -1.885 | -0.684 | -4.384 |
| 147 | H | 1.008  | -0.027 | -5.648 |
| 148 | H | 1.717  | -1.061 | -4.422 |
| 149 | H | 1.953  | 0.682  | -4.354 |
| 150 | H | -2.097 | 0.15   | -2.215 |
| 151 | H | -2.045 | 0.073  | 0.171  |
| 152 | H | -1.64  | 0.298  | 2.35   |
| 153 | H | 0.564  | -1.892 | 3.97   |
| 154 | H | 0.919  | -1.978 | 6.388  |
| 155 | C | 0.065  | -0.219 | 8.297  |
| 156 | H | -1.248 | 1.663  | 6.845  |
| 157 | H | -1.563 | 1.779  | 4.414  |
| 158 | H | 0.61   | -1.109 | 8.589  |
| 159 | H | -0.889 | -0.223 | 8.815  |
| 160 | H | 0.621  | 0.646  | 8.646  |
| 161 | H | 2.189  | -0.275 | -2.32  |
| 162 | H | 2.222  | -0.362 | 0.076  |
| 163 | H | 1.204  | -0.33  | 2.156  |

---
